# Supplementary material for: Population Genetic Structure Analysis Reveals Significant Genetic Differentiation of the Endemic Species Camellia chekiangoleosa Hu. with a Narrow Geographic Range
Source: MDPI journal article supplement (doi:10.3390/f13020234), 2022-02-03
Supplement: s1 [file s1]

Supplementary Table S1. Locality of *C. chekiangoleosa* populations sampled

| Codes | Population    | Latitude | Longitude | Elevation (m) | Status                | Sample |
|-------|---------------|----------|-----------|---------------|-----------------------|--------|
| GTS   | Gutianshan.Z  | 118°05'  | 29°17'    | 530-780       | Natural               | 50     |
| HS    | Hengshan. H   | 112°38'  | 27°14'    | 600-670       | Natural               | 36     |
| WYS   | Wuyishan.F    | 117°38'  | 27°44'    | 660-1250      | Natural               | 50     |
| SQS   | Sanqingshan.J | 118°03'  | 28°56'    | 850-1000      | Natural               | 50     |
| LS    | Lingshan.J    | 118°06'  | 29°24'    | 580-820       | Natural               | 48     |
| JRS   | Jinraoshan.F  | 116°57'  | 26°46'    | 1110-1240     | Natural               | 48     |
| ZR    | Zherong.F     | 119°57'  | 27°19'    | 680-720       | Natural               | 30     |
| FA    | Fuan.F        | 119°27'  | 27°09'    | 480-700       | Natural               | 32     |
| WLY   | Wuyaling.Z    | 119°40'  | 27°43'    | 740-1040      | Natural               | 40     |
| RLX   | Ruoliaoian.Z  | 119°17'  | 28°17'    | 990-1120      | Natural               | 48     |
| XP    | Xiapu.F       | 120°01'  | 27°03'    | 690           | Semi-wild<br>old tree | 48     |
| DMS   | Damaoshan.J   | 117°47'  | 28°51'    | 450-500       | Natural               | 48     |

Supplementary Table S2. Characteristics of 20 polymorphic microsatellite loci developed for *C. chekiangoleosa*

| Primer        | Primer sequence (5'~3')                      | Repeat motif                | T <sub>m</sub> (°C) | Fragment Size (bp) | GenBank Accession no. |
|---------------|----------------------------------------------|-----------------------------|---------------------|--------------------|-----------------------|
| CC_eSSR0<br>3 | F:GTGGCGTCTTTCTTTACT<br>R:ATTGACAAGCCTCATCGT | (CCT) <sub>10</sub>         | 56                  | 129                | JO845339              |
| CC_eSSR1<br>5 | F:TCTCATTGCCTGACATTC<br>R:AGTCCTTTCCCTCTTGCT | (TA) <sub>3</sub> (TC)<br>6 | 55                  | 189                | JO845341              |
| CC_eSSR1<br>6 | F:CGGTTAGGACCACCACAG<br>R:TGCCGCATCTTCTCAATT | (CAAGA<br>G) <sub>3</sub>   | 55                  | 240                | JO845342              |
| CC_eSSR2<br>9 | F:AATGACGACTGGGAGAAT<br>R:CGGAGACTATGGAGGAAT | (ATTCAT<br>) <sub>4</sub>   | 55                  | 284                | JO845343              |

|                |                                                 |                                            |    |     |          |
|----------------|-------------------------------------------------|--------------------------------------------|----|-----|----------|
| CC_eSSR3<br>7  | F:TACCAATCACGGTCAATACA<br>R:TCTTCTCAACACCCACAAC | (GA) <sub>9</sub>                          | 55 | 234 | JO845344 |
| CC_eSSR4<br>1  | F:CCCCATCCTTCCTCTGTT<br>R:AGGCGATTGAGAAGTGTTGC  | (CT) <sub>11</sub>                         | 55 | 156 | JO845345 |
| CC_eSSR4<br>8  | F:GCTCCGACGAAGTCTCCA<br>R:GTCCAGGTAACCCTCATT    | (GCGAG<br>A) <sub>4</sub>                  | 55 | 280 | JO845346 |
| CC_eSSR4<br>9  | F:TGACCCTGCCAATTCTAT<br>R:AAACAGCCAGTTCACCTT    | (GAGGC<br>T) <sub>4</sub>                  | 55 | 215 | JO845347 |
| CC_eSSR5<br>5  | F:TGAACCAGTAGCGTAGACC<br>R:TGCAAAGCATCCCACATT   | (AG) <sub>10</sub>                         | 55 | 196 | JO845348 |
| CC_eSSR8<br>3  | F:GCCACTTCTTCTTTCTCC<br>R:CCTCCATAATCCTAACCC    | (GA) <sub>11</sub>                         | 59 | 177 | JO845351 |
| CC_eSSR8<br>5  | F:GGGATTTGATTATGGTGG<br>R:ACGAGTCCGATGAGTAGG    | (TAC) <sub>8</sub>                         | 55 | 298 | JO845352 |
| CC_eSSR8<br>7  | F:CTTTACCCACCTATTCC<br>R:GACGACGATTGCTTCTC      | (AGAAG<br>) <sub>4</sub> (AG) <sub>2</sub> | 58 | 265 | JO845353 |
| CC_eSSR8<br>9  | F:TGCCTTTGACCAACTCTA<br>R:TTCCGACCTCCAACACTC    | (CCGAT<br>G) <sub>5</sub>                  | 55 | 252 | JO845354 |
| CC_eSSR9<br>2  | F:ACAAACACCACCAATGCA<br>R:ACGGCGTCTTCTGTCTCA    | (TAA) <sub>7</sub>                         | 55 | 136 | JO845355 |
| CC_eSSR9<br>5  | F:CAAGCGAACCAGAATACC<br>R:AGACCACGAAACAAACATAG  | (TGCCC<br>G) <sub>5</sub>                  | 60 | 150 | JO845356 |
| CC_eSSR1<br>01 | F:CATGGCTTCTGTTTCTTCC<br>R:TCTCGACCCTTTCTGCTT   | (CGCCT<br>C) <sub>3</sub>                  | 60 | 226 | JO845358 |

Supplementary Table S3. Genetic differentiation in *C. chekiangoleosa* populations by Nei's

|         | Ht    | Hs    | G <sub>ST</sub> | *Nm   |
|---------|-------|-------|-----------------|-------|
| Species | 0.607 | 0.453 | 0.255           | 0.731 |
| ST. Dev | 0.098 | 0.095 |                 |       |

Supplementary Table S4. Pair-wise  $F_{ST}$  value and spatial distance matrix of *C. chekiangoleosa*

| CODE | GTS   | HS     | WYS    | SQS    | LS     | JRS    | ZR     | FA     | WYL    | RLX    | XP     | DMS    |
|------|-------|--------|--------|--------|--------|--------|--------|--------|--------|--------|--------|--------|
| GTS  | ****  | 581.09 | 177.29 | 38.92  | 13.03  | 300.23 | 284.68 | 271.82 | 232.76 | 161.27 | 311.97 | 56.2   |
| HS   | 0.498 | ****   | 497.33 | 564.79 | 587.48 | 431.7  | 724.54 | 675.54 | 697.23 | 665.83 | 732.24 | 537.2  |
| WYS  | 0.133 | 0.571  | ****   | 139.08 | 190.21 | 126.65 | 233.48 | 190.86 | 200.51 | 173.33 | 247.6  | 124.58 |
| SQS  | 0.109 | 0.613  | 0.209  | ****   | 51.94  | 263.32 | 258.76 | 240.83 | 208.13 | 140.49 | 284.61 | 27.59  |
| LS   | 0.12  | 0.416  | 0.219  | 0.219  | ****   | 312.83 | 293.62 | 282.34 | 241.47 | 169.26 | 321.31 | 68.29  |
| JRS  | 0.229 | 0.863  | 0.281  | 0.343  | 0.214  | ****   | 303.8  | 251.79 | 288.88 | 285.2  | 306.22 | 244.94 |
| ZR   | 0.321 | 0.799  | 0.423  | 0.279  | 0.275  | 0.347  | ****   | 52.88  | 52.45  | 125.71 | 30.3   | 272.45 |
| FA   | 0.407 | 0.636  | 0.45   | 0.368  | 0.365  | 0.639  | 0.323  | ****   | 66.37  | 126.7  | 57.31  | 249.71 |
| WYL  | 0.335 | 0.817  | 0.403  | 0.249  | 0.426  | 0.498  | 0.197  | 0.226  | ****   | 73.27  | 81.63  | 223.4  |
| RLX  | 0.196 | 0.667  | 0.226  | 0.184  | 0.279  | 0.325  | 0.381  | 0.381  | 0.318  | ****   | 154.71 | 159.62 |
| XP   | 0.384 | 0.724  | 0.472  | 0.329  | 0.429  | 0.568  | 0.451  | 0.375  | 0.339  | 0.343  | ****   | 196.81 |
| DMS  | 0.099 | 0.425  | 0.151  | 0.09   | 0.149  | 0.199  | 0.213  | 0.311  | 0.251  | 0.171  | 0.218  | ****   |

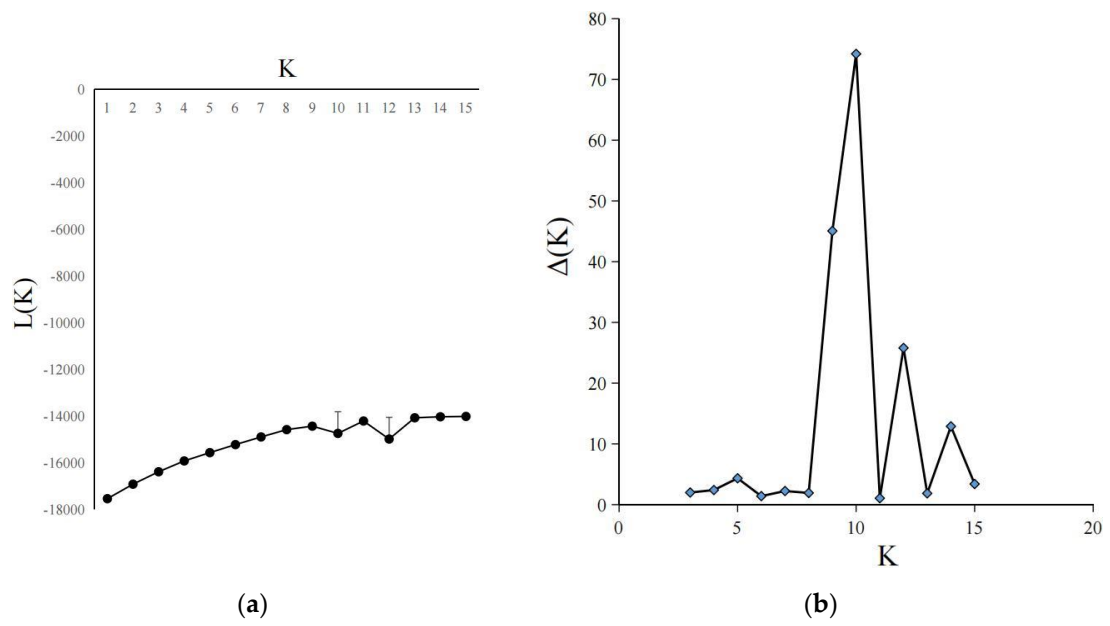

Supplementary Figure S1. **a**: The mean log-likelihood value of the data was based on ten repetitions for each K value. **b**: The delta K value was changed with each K value.
